# Supplementary material
Source: PubMed Central journal article supplement (PMC11029096)
Supplement: 262_2012_1350_MOESM1_ESM.pdf [file 262_2012_1350_MOESM1_ESM.pdf]

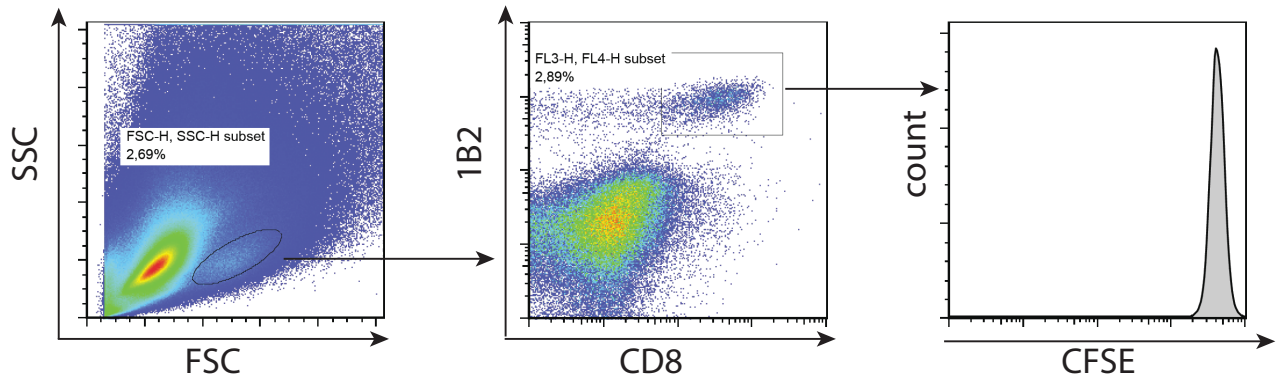

**Supplementary Figure 1:** Controlling lack of HP 15 hours after in vivo transfer of naïve 2C T cells. CFSE-labeled naïve 2C T cells ( $5 \times 10^6$ ) were transferred into a Rag2<sup>-/-</sup>. After 15 hours, inguinal LNs were harvested, homogenized and analyzed by flow cytometry for CFSE dilution of the transferred CD8<sup>+</sup>, 1B2<sup>+</sup> 2C T cells. Shown are results representative of two individual experiments.

Sponceram discs in 24 well plate

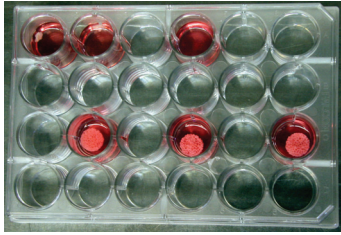

Sponceram magnification

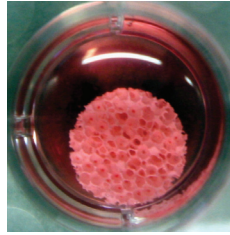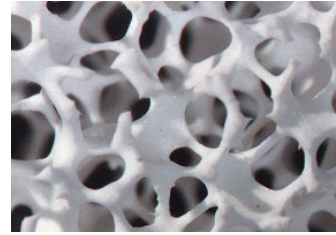

**Supplementary Figure 2:** Three-dimensional culture system. Collagen-coated Sponceram® discs were loaded with FRCs (day -2) or DCs (day -1) before adding naïve CFSE-labeled 2C T cells. Represented are the discs in culture medium. A microscopical picture of the structure provided by the company is shown in the magnification.

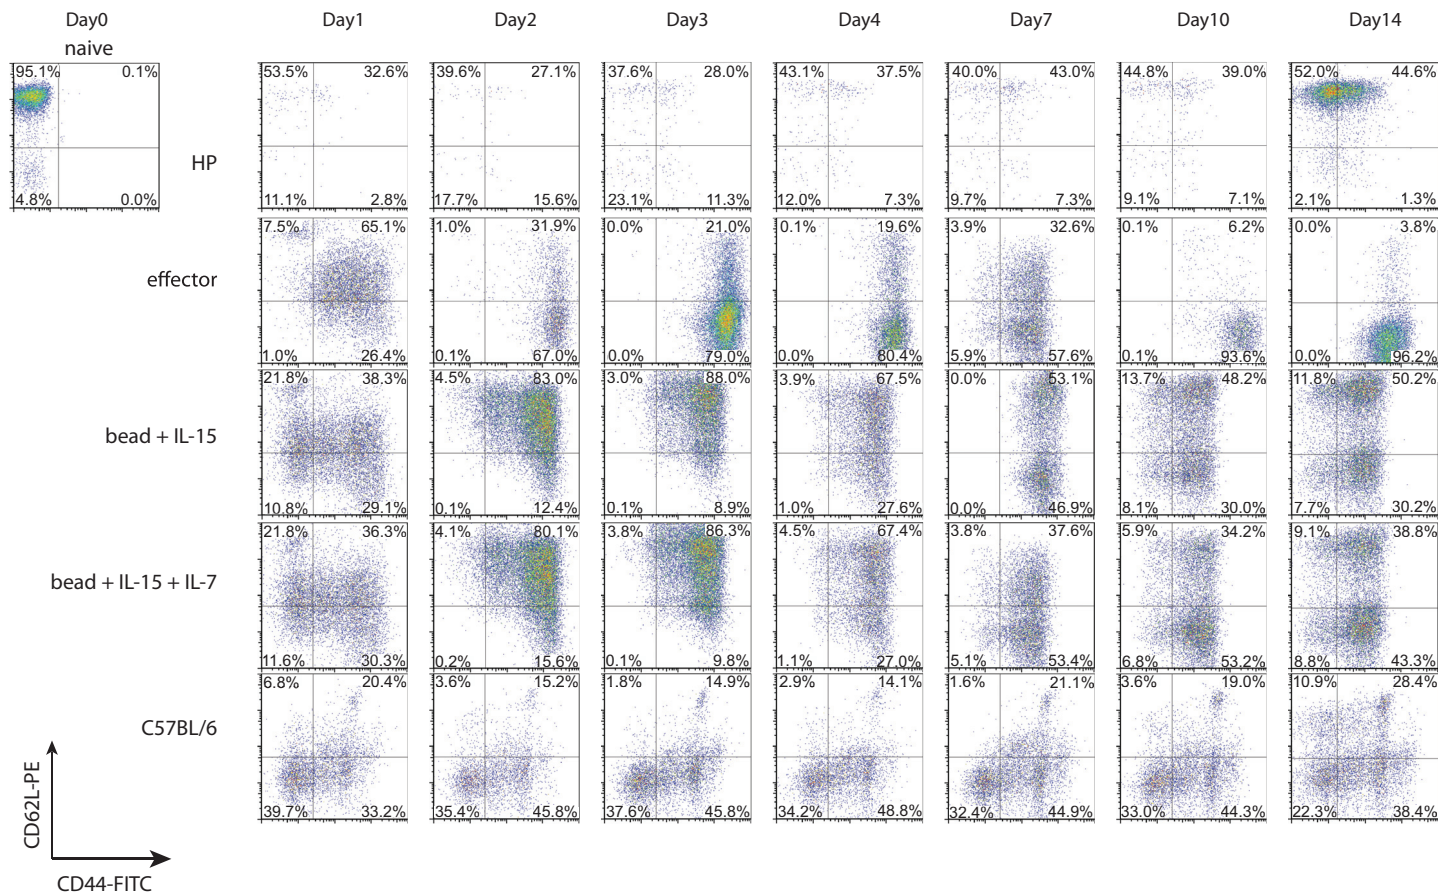

**Supplementary Figure 3:** Kinetic analysis of 2C T cell phenotypes during HP and in vitro stimulations. Flow cytometry analysis of CD62L and CD44 is shown for CD8<sup>+</sup>, 1B2<sup>+</sup> lymphoid cells at the indicated days. Day 0 shows naïve T cells. HP represents analysis from the blood of Rag2<sup>-/-</sup> mice that received 3-5x10<sup>6</sup> naïve 2C T cells on day 0. The effector group shows naïve T cells in vitro stimulated with P815.B7.1 (at a ratio 1:5). The bead groups include T cells stimulated in vitro with a 3 times excess of anti-CD3/CD28 coated beads in the presence of 200 ng/ml IL-15, 400 ng/ml IL-15RFcIg in combination with 50 n/ml IL-7 when indicated. Aliquots of cryopreserved C57BL/6 splenocytes were used as a control for performing the surface staining on various days.

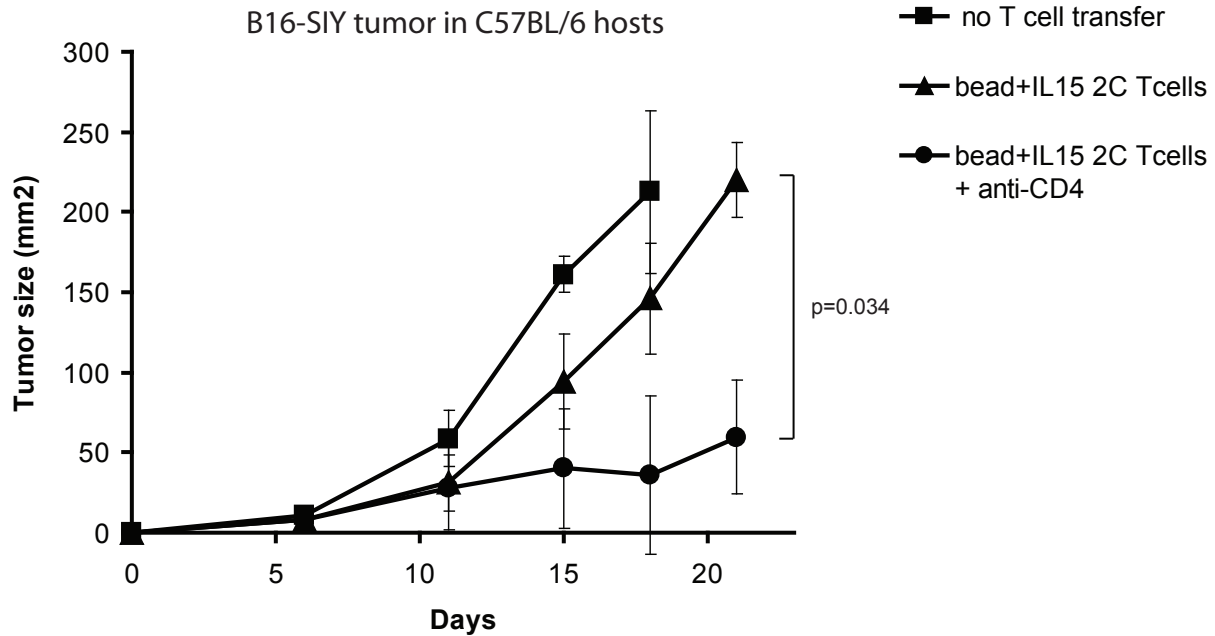

**Supplementary Figure 4:** Tumor growth control in wild type C57BL/6 is mediated by in vitro generated memory-like T cells in synergism with CD4 T cell depletion. On day 0, C57BL/6 mice were inoculated s.c. with  $5 \times 10^5$  B16-SIY tumor cells (stably gene modified to express the SIY peptide presented in H2-Kb which is also recognized by the 2C TCR). On day 1,  $1 \times 10^6$  bead + IL-15 stimulated 2C T cells were transferred i.v.. Where indicated, mice received 100ug anti-CD4 depleting antibody i.v. on days 0, 3, 7 and 10. Results are shown as mean  $\pm$  SEM. Differences between the indicated groups are significant ( $P=0.034$ ) as calculated by Wilcoxon rank sum test.
